# Supplementary material for: Gallstone Formation Follows a Different Trajectory in Bariatric Patients Compared to Nonbariatric Patients
Source: MDPI journal article supplement (doi:10.3390/metabo11100682), 2021-10-05
Supplement: s1 [file s1]

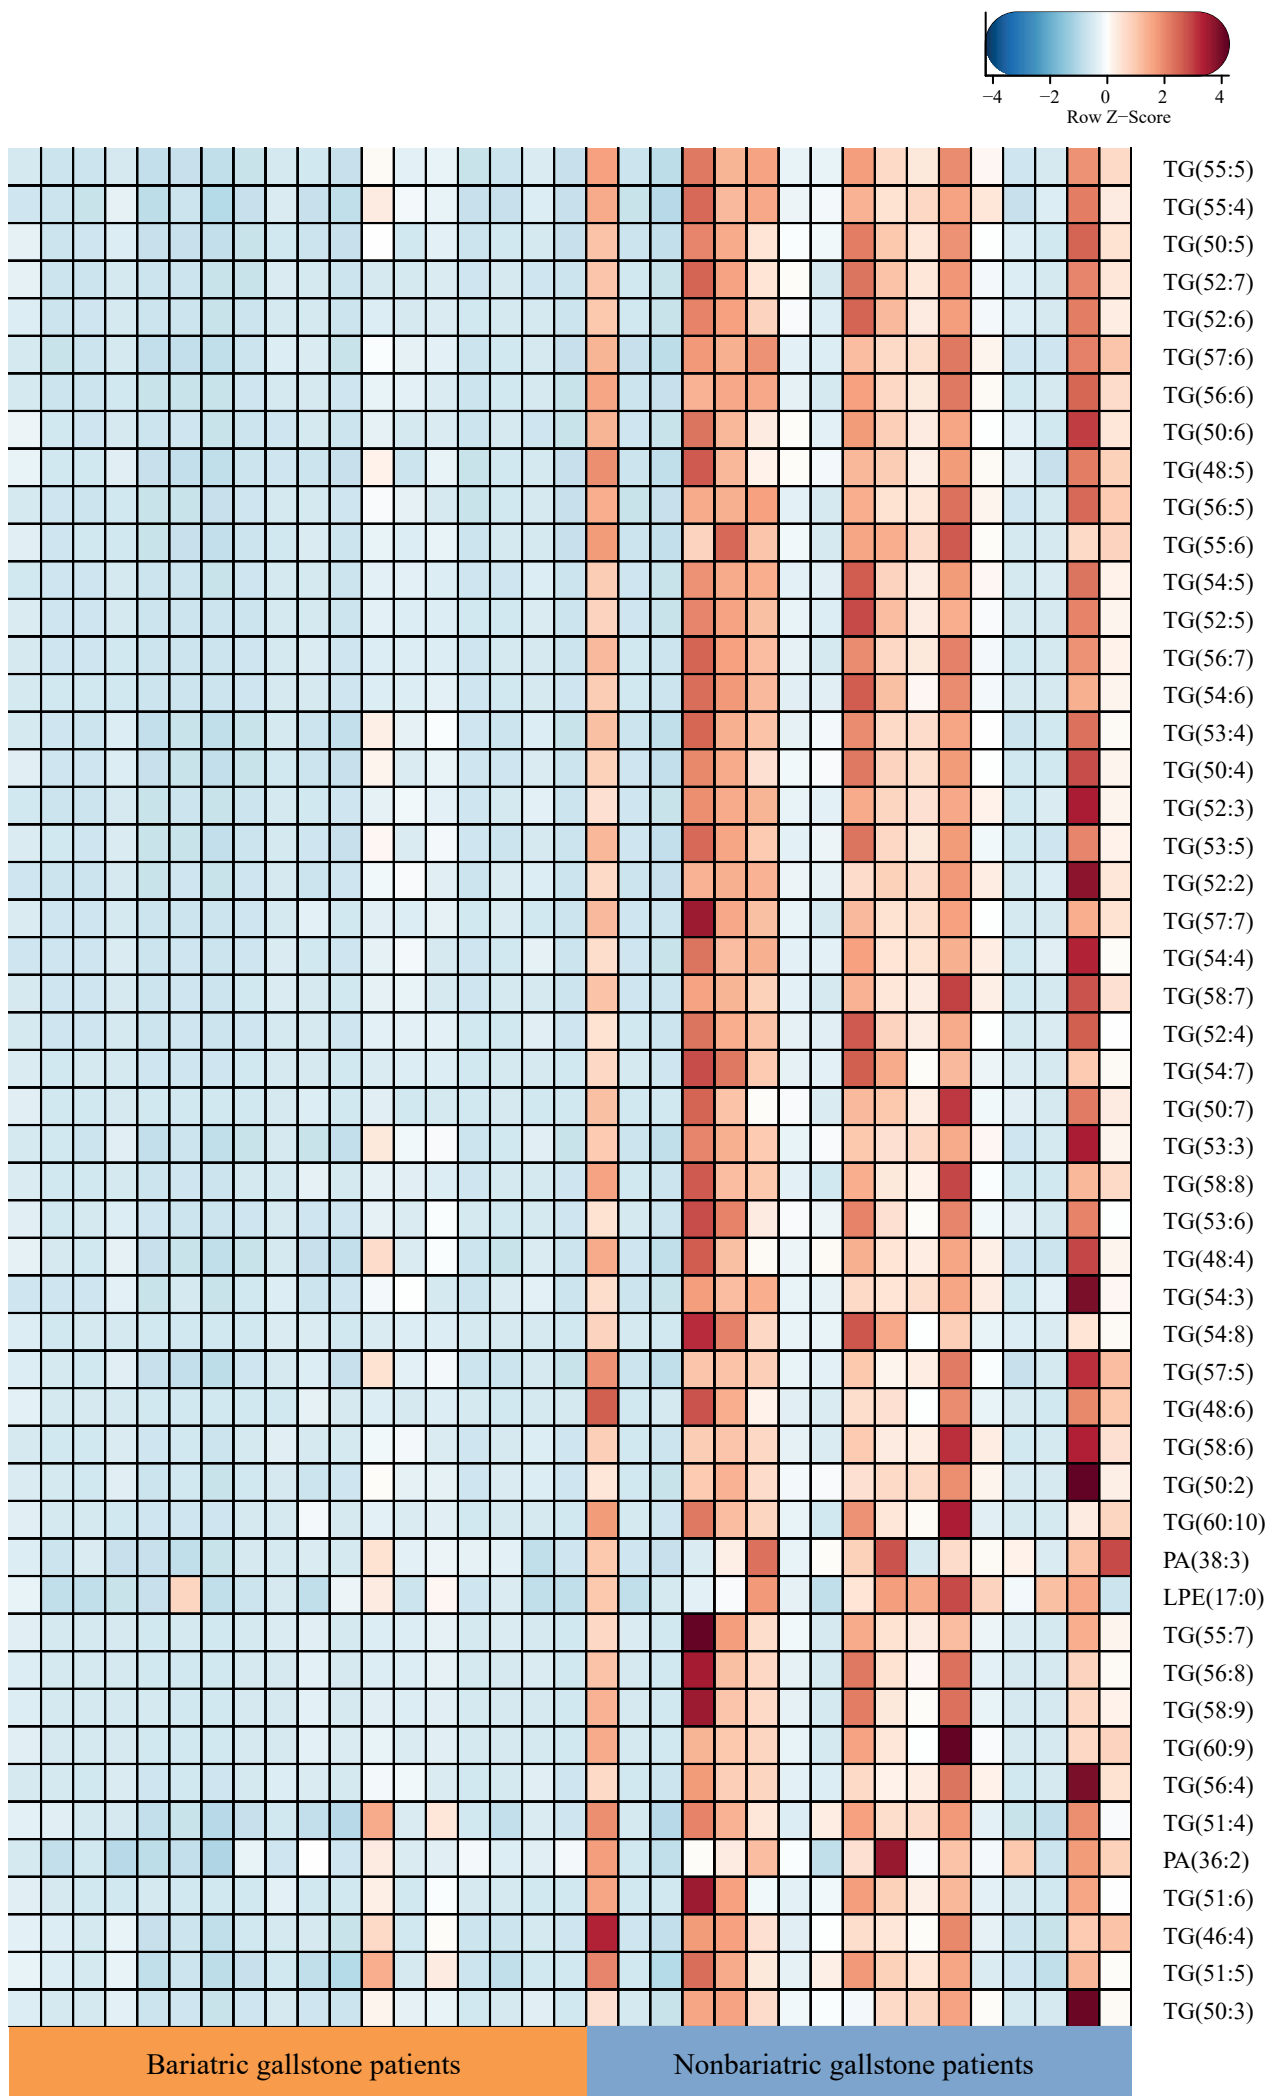

**Figure S2.** Heat-map of the most important (top 50) changed lipid species based on their p value. The heat-map was created by calculating the Z score of each individual sample in a row. The Z score indicates how many standard deviations each value deviates from the mean for that species and is represented as color in the heat-map.
