# Supplementary figures and images for: Gallstone Formation Follows a Different Trajectory in Bariatric Patients Compared to Nonbariatric Patients
Source: MDPI journal article supplement (doi:10.3390/metabo11100682), 2021-10-05

**Figure S1.** Partial least squares regression discriminant analysis.

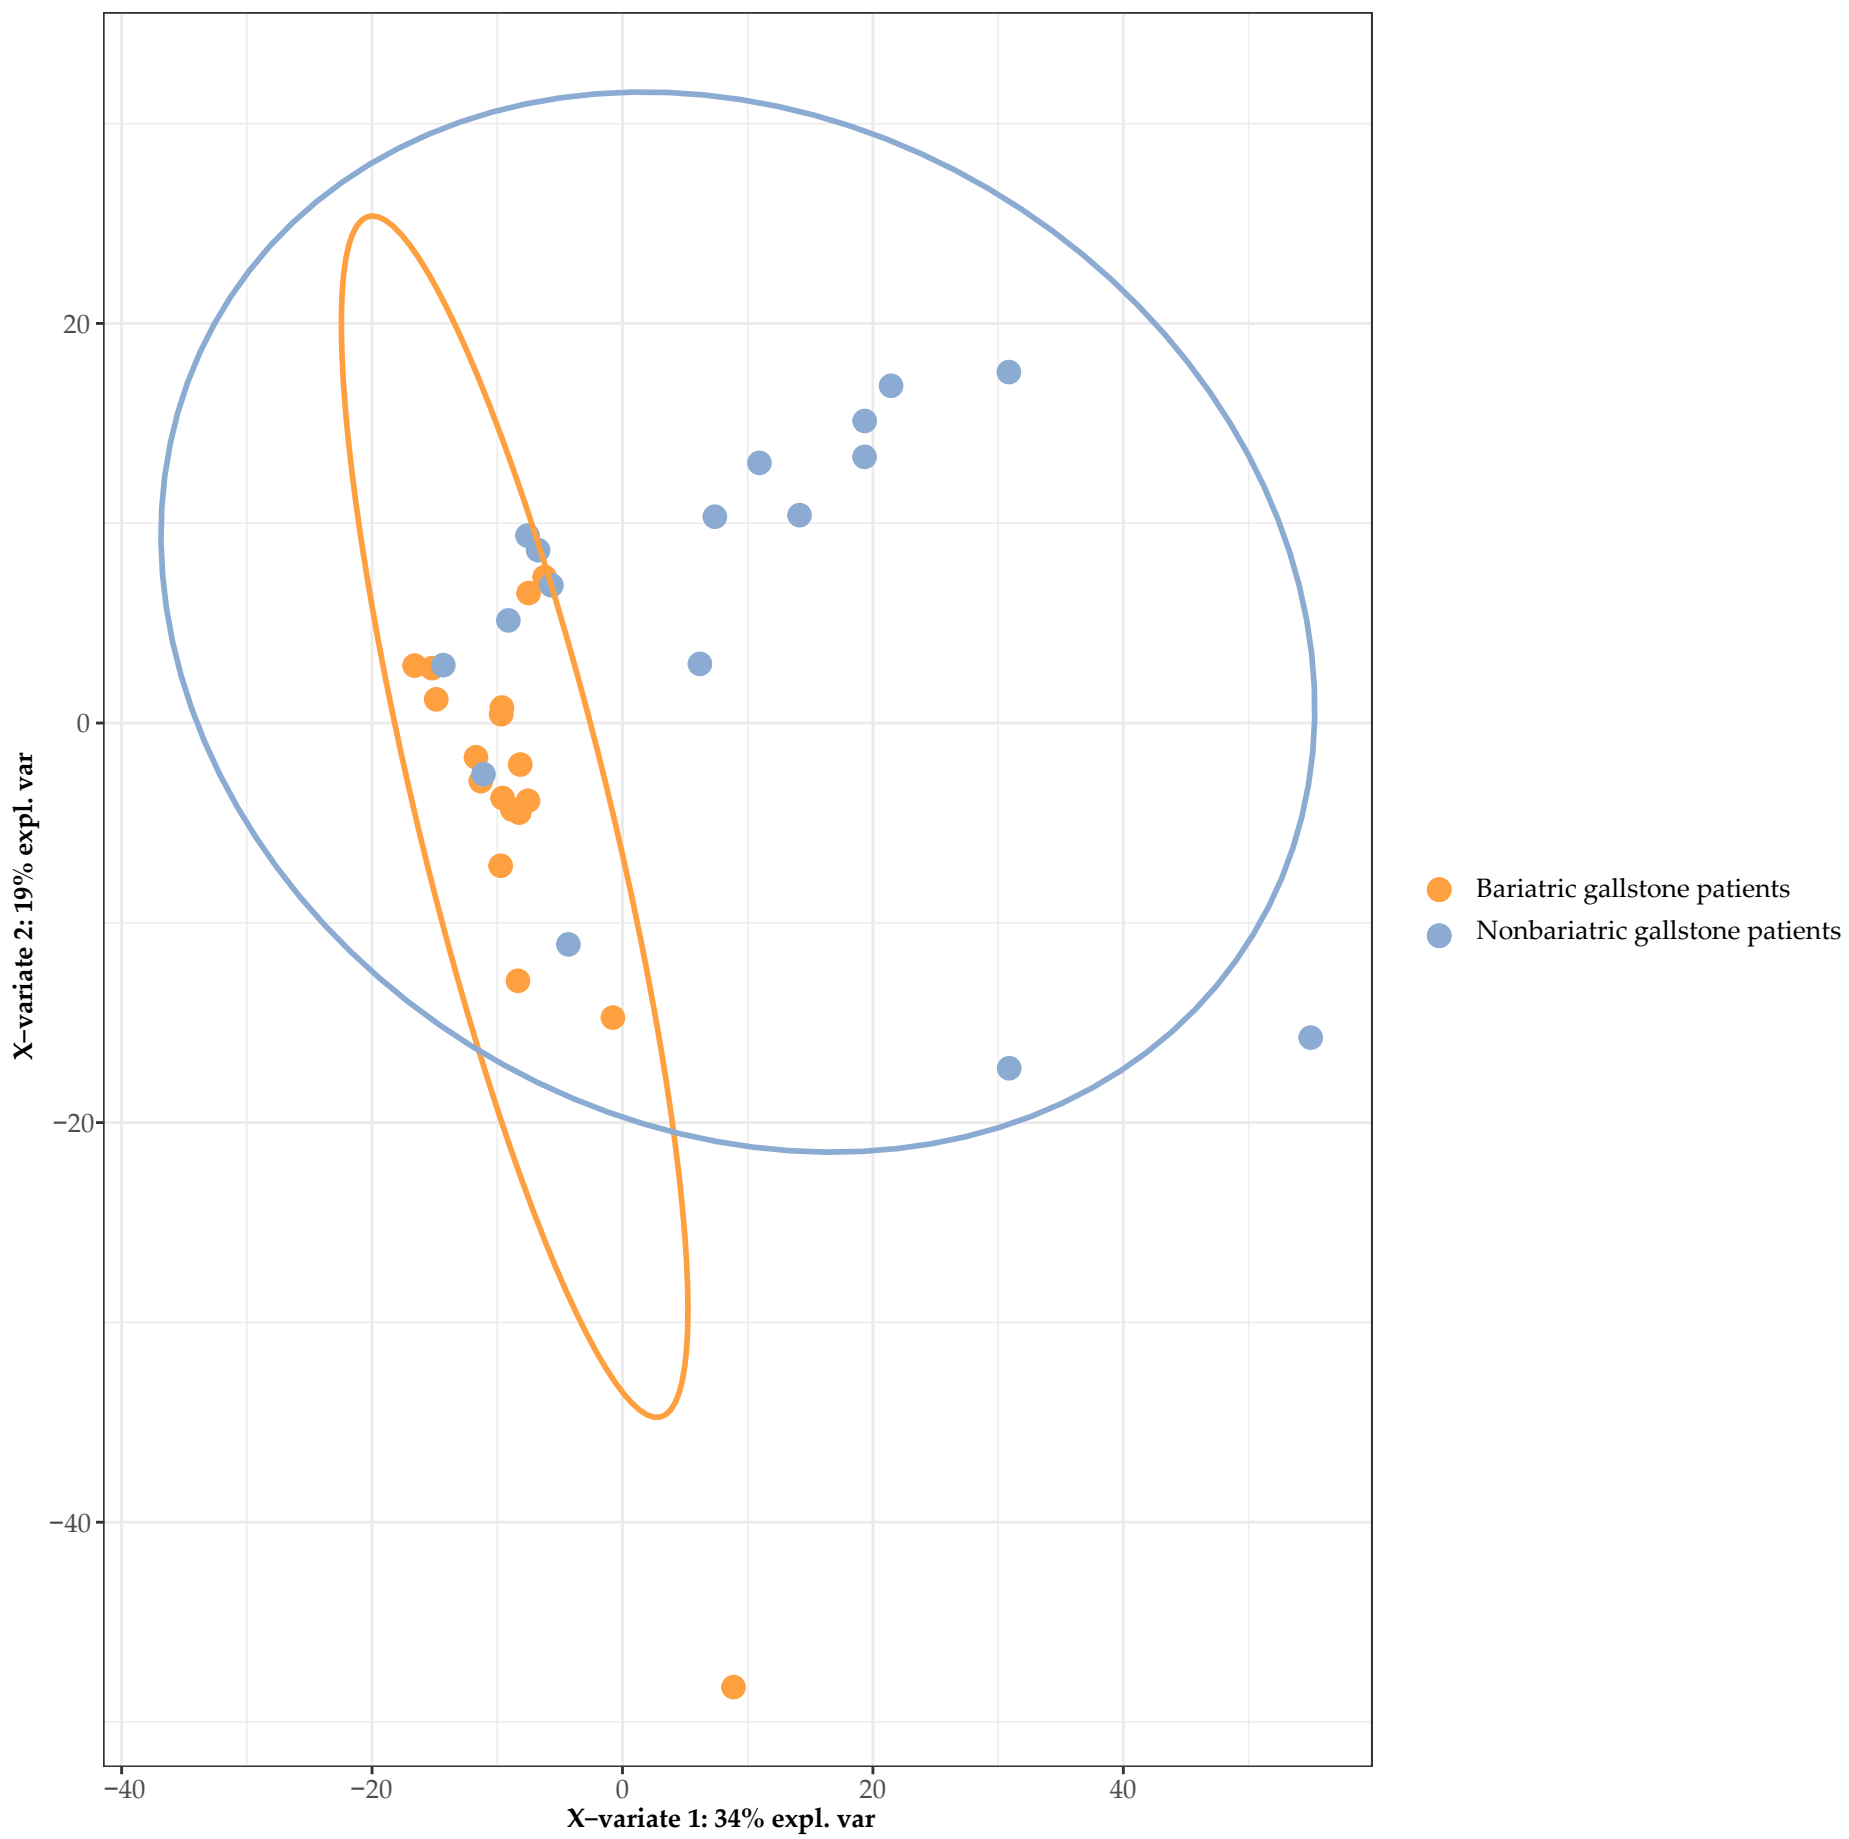

Supplement: s1 [file s1]
